# Supplementary material
Source: PubMed Central journal article supplement (PMC8608399)

# Figure S1

**A**

## Study 1

**all weight groups**

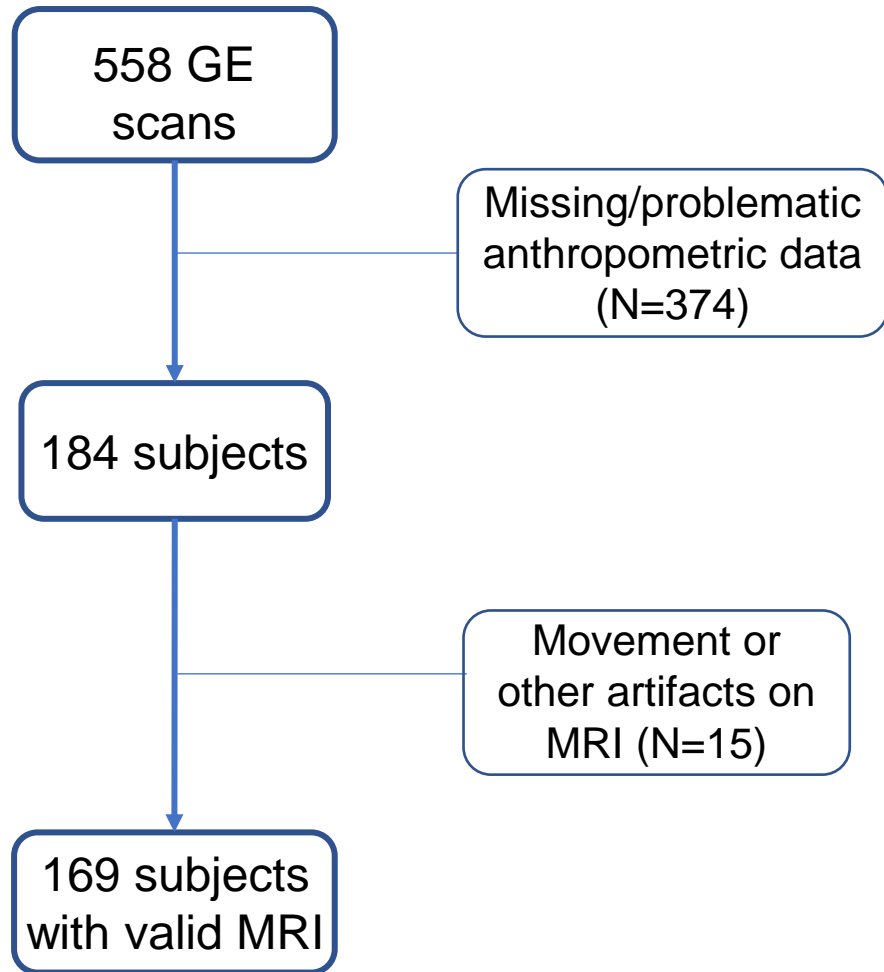

**B**

## Study 2

**overweight and with obesity groups**

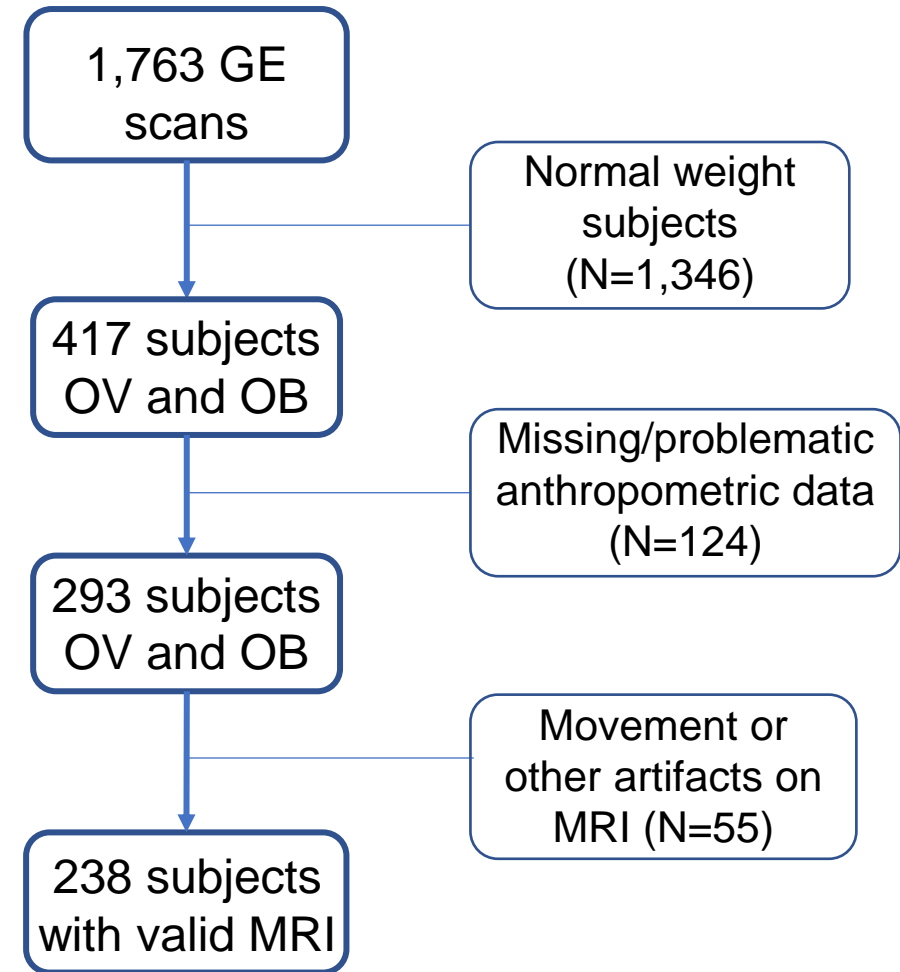

Supplement: NIHMS1735141-supplement-fS1.pdf [file NIHMS1735141-supplement-fS1.pdf]
